# Supplementary material
Source: PubMed Central journal article supplement (PMC2635077)
Supplement: blood-2008-03-142604_2.pdf [file blood-2008-03-142604_2.pdf]

| <b>Fraction</b> | <b>Affinity Matrix</b> | <b>Dilution</b> |
|-----------------|------------------------|-----------------|
| pH 9            | IMAC30                 | 1:4             |
| pH 9            | CM10                   | 1:10            |
| pH 6            | IMAC30                 | 1:1             |
| pH 6            | Q10                    | 1:4             |
| pH 5            | IMAC30                 | 1:10            |
| pH 5            | CM10                   | 1:10            |
| pH 5            | Q10                    | 1:5             |
| pH 4            | IMAC30                 | 1:5             |
| pH 4            | CM10                   | 1:5             |
| pH 3            | IMAC30                 | 1:4             |
| pH 3            | Q10                    | 1:4             |
| Organic         | IMAC30                 | 1:10            |
| Organic         | H50                    | 1:5             |
| Organic         | Q10                    | 1:5             |

Abbreviations: CM10, weak cation exchange; Q10, strong anion exchange; IMAC30, immobilized metal affinity capture; H50, reverse phase.
